# Supplementary material
Source: Springer Nature journal article supplement (https://www.springermedizin.de/resource/supplementary/12955_2013_1286_MOESM1_ESM.pdf/9559466)
Supplement: MOESM1 [file 9559466]

### Appendix 16.1.3 - List of Independent Ethics Committees or Institutional Review Boards

| Center No. | Ethics Committee or Institutional Review Board                                                           | Department / Organization                      | Address Country             |
|------------|----------------------------------------------------------------------------------------------------------|------------------------------------------------|-----------------------------|
| 0001       | UCL St. Luc                                                                                              | Avenue Hippocrate 55-14, Tour Harvey, niveau 0 | Bruxelles 1200 Belgium      |
| 0010       | EK Revmatologický ústav                                                                                  | Na Slupi 4                                     | Praha 128 50 Czech Republic |
| 0011       | Etická komise pro multicentrická hodnocení FN Motol                                                      | Fakultní nemocnice v Motole, V úvalu 84        | Praha 150 06 Czech Republic |
| 0012       | Etická komise pro multicentrická hodnocení FN Motol                                                      | Fakultní nemocnice v Motole, V úvalu 84        | Praha 150 06 Czech Republic |
| 0013       | Etická komise pro multicentrická hodnocení FN Motol                                                      | Fakultní nemocnice v Motole, V úvalu 84        | Praha 150 06 Czech Republic |
| 0040       | Ethik-Kommission der Medizinischen Fakultät der Technischen Universität München Klinikum rechts der Isar | Ismaninger Str. 22                             | Muenchen 81675 Germany      |
| 0041       | Ethik-Kommission der Medizinischen Fakultät der Technischen Universität München Klinikum rechts der Isar | Ismaninger Str. 22                             | Muenchen 81675 Germany      |
| 0042       | Ethik-Kommission der Medizinischen Fakultät der Technischen Universität München Klinikum rechts der Isar | Ismaninger Str. 22                             | Muenchen 81675 Germany      |
| 0045       | Ethik-Kommission der Medizinischen Fakultät der Technischen Universität München Klinikum rechts der Isar | Ismaninger Str. 22                             | Muenchen 81675 Germany      |
| 0047       | Ethik-Kommission der Medizinischen Fakultät der Technischen Universität München Klinikum rechts der Isar | Ismaninger Str. 22                             | Muenchen 81675 Germany      |
| 0048       | Ethik-Kommission der Medizinischen Fakultät der Technischen Universität München Klinikum rechts der Isar | Ismaninger Str. 22                             | Muenchen 81675 Germany      |

| Center No. | Ethics Committee or Institutional Review Board                                                                                                     | Department / Organization                                                                                                                              | Address Country                         |
|------------|----------------------------------------------------------------------------------------------------------------------------------------------------|--------------------------------------------------------------------------------------------------------------------------------------------------------|-----------------------------------------|
| 0062       | Debreceni Egyetem Orvos- és Egészségtudományi Centrum (DEOEC RKEB/IKEB) Tudományos Bizottságának Regionális és Intézményi Kutatásetikai Bizottsága | Nagyerdei krt. 98.                                                                                                                                     | Debrecen 4032 Hungary                   |
| 0064       | BMKT Pándy Kálmán Kórház Intézeti Kutatásetikai Bizottság                                                                                          | Semmelweis u. 1.                                                                                                                                       | Gyula 5700 Hungary                      |
| 0065       | MÁV Kórház és Rendelőintézet Intézeti Kutatásetikai Bizottság                                                                                      | Versegly u. 6-8.                                                                                                                                       | Szolnok 5000 Hungary                    |
| 0080       | NHO Sagamihara National Hospital Institutional Reveiw Board                                                                                        | 18-1,Sakuradai, Minami-ku                                                                                                                              | Sagamihara City Kanagawa 252-0392 Japan |
| 0081       | Jinbo Orthopedic Hospital Institutional Reveiw Board                                                                                               | 5-38-41,Honcho                                                                                                                                         | Koganei city Tokyo 184-0004 Japan       |
| 0082       | Nakayama Internal Medicine, Rheumatology & Allergy Institutional Reveiw Board                                                                      | 1-7-4,Higashikawasakicho,Chuo-ku                                                                                                                       | Kobe city Hyogo 650-0044 Japan          |
| 0084       | Aso Co., Ltd, Iizuka Hospital Institutional Reveiw Board                                                                                           | 3-83,Yoshiocho                                                                                                                                         | Iizuka city Fukuoka 820-8505 Japan      |
| 0086       | Shinagawa East One Medical Clinic Institutional Reveiw Board                                                                                       | 2-16-1, Konan                                                                                                                                          | Shinagawa-ku Tokyo 108-0075 Japan       |
| 0100       | Institutional Review Board / Seoul St. Mary Hospital, The Catholic University of Korea                                                             | #505, Banpo-Dong, Seocho-Gu                                                                                                                            | Seoul 137-040 Korea                     |
| 0101       | IRB / Pusan National University Hospital                                                                                                           | Clinical Research Center of Medical Research Institute, Pusan National University Hospital 3Fl., Office Building, 305 Gudeok-Ro, Seo-Gu(1Ga, Ami-Dong) | Busan 602-739 Korea                     |
| 0102       | IRB / Hallym University Medical Center                                                                                                             | 2nd bilding, 896, Pyeongchon-dong, Dongan-gu, Anyang                                                                                                   | Gyeonggi-do 431-070 Korea               |
| 0103       | IRB / Konkuk University Hospital                                                                                                                   | 4-12, Hwayang-dong, Gwangjin-gu                                                                                                                        | Seoul 143-914 Korea                     |

| Center No. | Ethics Committee or Institutional Review Board                                                                                              | Department / Organization       | Address Country                 |
|------------|---------------------------------------------------------------------------------------------------------------------------------------------|---------------------------------|---------------------------------|
| 0200       | Local EC Komisja Bioetyczna przy Okręgowej Izbie Lekarskiej w Białymstoku                                                                   | ul. Świętojańska 7              | Białystok 15-082 Poland         |
| 0201       | Coordinating EC - Komisja Bioetyczna przy Okręgowej Izbie Lekarskiej w Białymstoku                                                          | ul. Świętojańska 7              | Białystok 15-082 Poland         |
| 0203       | Local EC - Komisja Bioetyczna przy Okręgowej Izbie Lekarskiej w Lublinie                                                                    | ul. Chmielna 4                  | Lublin 20-079 Poland            |
| 0301       | Ethic Committee of State institution "Institute of Rheumatology RAMS"                                                                       | 34 a Kashirskoe shosse          | Moscow 115522 Russia            |
| 0302       | Ethic Committee of Moscow City Hospital #20                                                                                                 | 15, Lenskaya str.               | Moscow 129327 Russia            |
| 0303       | Ethic Committee of Moscow 1st City Clinical Hospital                                                                                        | 8, Leninsky pr.                 | Moscow 119049 Russia            |
| 0304       | Ethic Committee of Medical Academy of Postgraduate Studies                                                                                  | 41, Kyrochnaya str.             | Saint-Petersburg 193015 Russia  |
| 0305       | Ethic Committee of City Hospital #25                                                                                                        | 30, Bolshaya Podyacheskaya str. | Saint-Petersburg 190068 Russia  |
| 0306       | Ethic Committee City Mariinsky Hospital                                                                                                     | 56, Litejny pr                  | St. Petersburg 191104 Russia    |
| 0307       | Ethic committee of Municipal Institution of HealthCare "Yaroslavl Clinical City Hospital of Emergency call service named after N.V.Soloviev | Zagorodny Sad, 11               | Yaroslavl 150003 Russia         |
| 0308       | Ethic committee of Tver State Medical Academy                                                                                               | 4, Sovetskaya str.              | Tver 170036 Russia              |
| 0309       | Ethic committee of Regional Clinical Hospital                                                                                               | 1a, Yablochkov str.             | Tula 300053 Russia              |
| 0400       | Etická komisia NÚRCH                                                                                                                        | Nábřežie Ivana Krasku 4         | Piešťany 921 01 Slovakia        |
| 0401       | Etická komisia FNŠP F.D.Roosevelta                                                                                                          | Nám. L. Svobodu 1               | Banská Bystrica 975 17 Slovakia |

| Center No. | Ethics Committee or Institutional Review Board                     | Department / Organization               | Address Country                |
|------------|--------------------------------------------------------------------|-----------------------------------------|--------------------------------|
| 0402       | Etická komisia Košica                                              | Košica-Šaca Lúčna 57                    | Košice 040 15 Slovakia         |
| 0501       | Quorum Review, Inc                                                 | 1601 Fifth Ave. Suite 1000              | Seattle WA 98101 Unites States |
| 0502       | Quorum Review, Inc                                                 | 1601 Fifth Ave. Suite 1000              | Seattle WA 98101 Unites States |
| 0503       | Quorum Review, Inc                                                 | 1601 Fifth Ave. Suite 1000              | Seattle WA 98101 Unites States |
| 0506       | Quorum Review, Inc                                                 | 1601 Fifth Ave. Suite 1000              | Seattle WA 98101 Unites States |
| 0507       | Quorum Review, Inc                                                 | 1601 Fifth Ave. Suite 1000              | Seattle WA 98101 Unites States |
| 0509       | Quorum Review, Inc                                                 | 1601 Fifth Ave. Suite 1000              | Seattle WA 98101 Unites States |
| 0510       | Quorum Review, Inc                                                 | 1601 Fifth Ave. Suite 1000              | Seattle WA 98101 Unites States |
| 0512       | Quorum Review, Inc                                                 | 1601 Fifth Ave. Suite 1000              | Seattle WA 98101 Unites States |
| 0514       | Quorum Review, Inc                                                 | 1601 Fifth Ave. Suite 1000              | Seattle WA 98101 Unites States |
| 0517       | Quorum Review, Inc                                                 | 1601 Fifth Ave. Suite 1000              | Seattle WA 98101 Unites States |
| 0517       | Quorum Review, Inc                                                 | 1601 Fifth Ave. Suite 1000              | Seattle WA 98101 Unites States |
| 0519       | Quorum Review, Inc                                                 | 1601 Fifth Ave. Suite 1000              | Seattle WA 98101 Unites States |
| 0520       | Quorum Review, Inc                                                 | 1601 Fifth Ave. Suite 1000              | Seattle WA 98101 Unites States |
| 0600       | Taichung Veterans General Hospital Institutional Review Board      | 40705 No. 160, TaichungKang Rd. Sec. 3  | Taichung 40705 Taiwan          |
| 0601       | China Medical University Hospital Institutional Review Board       | 40447 No.2, Yude Rd., North District    | Taichung City 40447 Taiwan     |
| 0602       | Chang-Shang Medical University Hospital Institutional Review Board | 40201 No.110, Sec, 1, Chien-Kuo N. Road | Taichung 40201 Taiwan          |
| 0604       | Kaohsiung Veterans General Hospital Institutional Review Board     | 81346 No. 386, Ta-Chun 2st Road         | Kaohusing 81346 Taiwan         |
